1 **Tissue- and sex-specific small RNAomes reveal sex**  
2 **differences in response to the environment**

3 Alexandra Bezler (alexandra.bezler@epfl.ch) <sup>1</sup>, present address <sup>2,3</sup>

4 Fabian Braukmann (f.braukmann@gurdon.cam.ac.uk) <sup>3,4,5,6</sup>

5 Sean West (swest9@gmail.com) <sup>7,8</sup>

6 Arthur Duplan (arthur.duplan@hotmail.ch) <sup>1</sup>

7 Raffaella Conconi (raffaellaconconi@gmail.com) <sup>1</sup>

8 Frédéric Schütz (frederic.schutz@sib.swiss) <sup>9</sup>

9 Pierre Gönczy (pierre.gonczy@epfl.ch) <sup>2</sup>

10 Fabio Piano (fp1@nyu.edu) <sup>7,10</sup>

11 Kristin Gunsalus (kcg1@nyu.edu) <sup>7,10</sup>

12 Eric A. Miska (eam29@cam.ac.uk) <sup>4,5,6,\*</sup>

13 Laurent Keller (laurent.keller@unil.ch) <sup>1,\*</sup>

14

15 <sup>1</sup> Department of Ecology and Evolution, University of Lausanne, Switzerland

16 <sup>2</sup> Swiss Institute for Experimental Cancer Research (ISREC), School of Life Sciences, Swiss  
17 Federal Institute of Technology (EPFL), Lausanne, Switzerland

18 <sup>3</sup> These authors contributed equally to this work

19 <sup>4</sup> Gurdon Institute, University of Cambridge, Cambridge, UK

20 <sup>5</sup> Department of Genetics, University of Cambridge, Cambridge, UK

21 <sup>6</sup> Wellcome Sanger Institute, Wellcome Genome Campus, Cambridge, UK

22 <sup>7</sup> Center for Genomics & Systems Biology, Department of Biology, New York University, New  
23 York, NY

24 <sup>8</sup> Present address: Biologics Discovery California, Bristol-Myers Squibb, Redwood City, CA

25 <sup>9</sup> Bioinformatics Core Facility; SIB Swiss Institute of Bioinformatics and Centre for Integrative  
26 Genomics, University of Lausanne, Switzerland

27 <sup>10</sup> Center for Genomics & Systems Biology, NYU Abu Dhabi, Abu Dhabi, UAE

28

29 \* Correspondence:

30 EAM (eam29@cam.ac.uk) and LK (laurent.keller@unil.ch).

31

32 **KEYWORDS**

33 germline sex, *C. elegans*, small RNA, RNA interference, RNA-seq

34 **ABSTRACT**

35 **Background**

36 RNA interference (RNAi) related pathways are essential for germline  
37 development and fertility in metazoa and can contribute to inter- and trans-  
38 generational inheritance. In the nematode *Caenorhabditis elegans*  
39 environmental double-stranded RNA provided by feeding can lead to heritable  
40 changes in phenotype and gene expression. Notably, transmission efficiency  
41 differs between the male and female germline, yet the underlying mechanisms  
42 remain elusive.

43 **Results**

44 Here we use high-throughput sequencing of dissected gonads to quantify sex-  
45 specific endogenous piRNAs, miRNAs and siRNAs in the *C. elegans* germline  
46 and the somatic gonad. We identify genes with exceptionally high levels of  
47 22G RNAs that are associated with low mRNA expression, a signature  
48 compatible with silencing. We further demonstrate that contrary to the  
49 hermaphrodite germline, the male germline, but not male soma, is resistant to  
50 environmental RNAi triggers provided by feeding. This sex-difference in  
51 silencing efficacy is associated with lower levels of gonadal RNAi amplification  
52 products. Moreover, this tissue- and sex-specific RNAi resistance is regulated  
53 by the germline, since mutant males with a feminized germline are RNAi  
54 sensitive.

55 **Conclusion**

56 This study provides important sex-and tissue-specific expression data of  
57 miRNA, piRNA and siRNA as well as mechanistic insights into sex-differences  
58 of gene regulation in response to environmental cues.

59

## 60 **BACKGROUND**

61 The environment can induce changes in phenotype and gene expression that  
62 persist across multiple generations [reviewed in 1]. Such intra- and trans-  
63 generational inheritance can pass both through the male and female  
64 germlines. Several studies have revealed sex-differences in transmission  
65 efficiency of heritable phenotypic changes, yet the underlying molecular  
66 mechanisms remain unknown [2–5].

67

68 In the nematode *Caenorhabditis elegans*, environmental cues such as  
69 starvation, viral RNA or environmental RNA can trigger heritable phenotypic  
70 changes that are transmitted via small RNA [6–8]. The mechanisms of trans-  
71 generational inheritance are best understood from studies of environmental  
72 RNA [5,6,9–11]. In *C. elegans* phenotypic changes induced by environmental  
73 RNAi require a double stranded RNA (dsRNA) entering the animal via a  
74 dedicated dsRNA transporter [12,13]. Thereafter, exogenous dsRNAs are  
75 processed by the conserved nuclease Dicer into ~22 nucleotide (nt) primary  
76 small interfering RNAs (siRNA) and incorporated into Argonaute proteins to  
77 form the RNA-induced silencing complex (RISC) [14,15]. This protein-RNA  
78 complex binds complementary mRNA sequences and initiates the production  
79 of secondary siRNA by RNA-dependent RNA polymerases (RdRP) (Fig 1A)  
80 [16–18]. Such secondary siRNAs are 22 nt with a 5' guanine, thus named  
81 22G RNAs [19]. Primary and secondary siRNA trigger systemic gene  
82 silencing of complementary sequences through destabilization of mRNA or  
83 translational repression (Fig 1A)[20–22]. Once established, phenotypic

84 changes induced by exogenous dsRNA can be transmitted over multiple  
85 generations [9,11,22].

86

87 On top of their role in trans-generational inheritance, some endogenous small  
88 RNA types – such as miRNA, piRNA and siRNA – are essential for  
89 development and fertility in both sexes of *C. elegans*. Albeit distinguishable,  
90 those small RNA types share some biogenesis and silencing mechanisms  
91 (Fig 1A). One major class of small RNA, miRNAs, regulate translation of  
92 mRNA targets via partially complementary base-pairing. Many miRNAs are  
93 expressed in a tissue- and sex-specific manner reflecting functional  
94 sex-differences [23–26]. For instance, miR-35 family activity in the female  
95 germline is important for progeny viability and fecundity [27–29]. Furthermore,  
96 distinct Argonaute proteins associate with additional types of endogenous  
97 siRNAs in the male and female germline, suggesting functional sex-  
98 differences [19,30–34]. Importantly, germline-expressed PIWI-bound  
99 small RNA (piRNA) populations target mRNA and thus maintain genome  
100 stability in hermaphrodites and males [35–38]. Such piRNAs come in two  
101 flavours: type I piRNA are expressed from two genomic loci have a conserved  
102 upstream motif, whereas type II piRNAs lack an apparent upstream motif and  
103 are dispersed throughout the genome [39]. In *C. elegans*, another group of  
104 endogenous small RNAs are expressed in the gonads of both sexes. Such  
105 siRNAs can be distinguished by length and are either (i) primary products of  
106 the RNase III enzyme Dicer/DCR-1 (e.g., 26G RNA) or (ii) secondary  
107 products of RNA-dependent RNA polymerases (e.g., 22G RNA) (Fig 1A).  
108 Both types of endogenous siRNAs modulate gene expression and are

109 essential for fertility, but very little is known about potential sex-differences in  
110 their gonadal expression [30,32,33].

111

112 The reproductive tissue of *C. elegans* consists of the germline surrounded by  
113 the somatic gonad, and development of both tissues is coordinated by  
114 multiple mechanisms [40]. Notably, miRNA activity in the somatic gonad is  
115 essential for gonad development and germline proliferation, and thus fertility  
116 [41,42]. However, a comprehensive tissue- and sex-specific expression study  
117 of gonadal siRNA is lacking.

118

119 Males and females also present germline sex-specific differences in response  
120 to environmental cues. First, RNAi in hermaphrodite gonads induces very  
121 strong knockdown phenotypes [2,43–45], in contrast to anecdotal evidence for  
122 mostly no detectable RNAi phenotypes in *C. elegans* sperm [2,43,46–48].  
123 Second, siRNA induced trans-generational silencing is often more efficient  
124 through the female than the male germline [2–5]. The underlying mechanisms  
125 causing these sex-differences are not well understood.

126

127 Here we provide a comprehensive study of both the genetically-determined  
128 small RNAome and environmentally-induced siRNA silencing. First, we  
129 quantify sex-biased expression of miRNA, piRNA and siRNA in isolated male  
130 and female gonads. We further ascribe small RNA sex-differences to the  
131 germline or somatic gonad by comparing gonads of each sex to mutant male  
132 gonads (*fog-3*) with a female germline. Quantitative analysis of gonadal  
133 expression of mRNA and 22G RNA identified genes with low mRNA

134 expression and high 22G RNA levels, a signature compatible with silencing.  
135 Second, using environmental RNAi targeting a GFP-sensor we show that  
136 germline RNAi silencing efficacy is determined by germline sex. This tissue-  
137 specific sex-difference in silencing efficacy was associated with lower levels of  
138 RNAi amplification products in male than female gonads. These data provide  
139 a mechanistic basis for sex-differences in germline RNAi efficacy with  
140 implications for trans-generational inheritance.

141

## 142 **RESULTS**

### 143 **The small RNAome of male and hermaphrodite gonadal tissues**

144 To identify small RNAs expressed in hermaphrodite and male gonads, we  
145 quantified small RNA populations (Fig 1A) from dissected *C. elegans* gonads  
146 by high-throughput sequencing (Fig 1B). This approach allowed us to  
147 simultaneously analyse and compare tissue-specific expression of miRNA,  
148 piRNA and siRNAs of *C. elegans* gonads.

149

### 150 **miRNAs with sex-biased germline or somatic gonad expression**

151 Of the 257 annotated miRNAs in the *C. elegans* genome (assembly WS235,  
152 miRBase release 21) we detected 93 in hermaphrodite gonads and 112  
153 miRNAs in male gonads (Fig 1C; minimum 5 mean sense reads across  
154 replicates, additional file 2). To uncover quantitative differences in miRNA  
155 expression between sexes, we compared normalized read counts between  
156 hermaphrodite and male gonads. By using a cut-off of four-fold difference in  
157 abundance and a false-discovery rate of 1%, we identified 37 miRNAs with  
158 sex-biased gonad expression (Fig 1C).

159 Since the gonads consist of two tissue types, the germline and the somatic  
160 gonad, the observed difference between hermaphrodite and male may stem  
161 from expression differences in either tissue. To determine the contribution of  
162 the germline, we made use of mutant males that have a feminized germline  
163 and a male somatic gonad (i.e., the loss of function allele *fog-3(q849[E126K]*  
164 called *fog-3* or 'feminized male' for clarity) [49,50]. The comparison of the  
165 control male and feminized male gonads allows one to uncover differences  
166 that stem only from the germline, since both types of individuals have identical  
167 male somatic gonads (Fig 1B). Of the 37 miRNAs with sex-biased gonad  
168 expression, nine were differentially expressed between the male and  
169 feminized male gonads (Fig 1D). Eight of them (including all from the miR-35-  
170 41 cluster and miR-44) were expressed more highly in the feminized germline  
171 (*fog-3* gonads) whereas only one (miR-8191) was more highly expressed in  
172 the male germline (male gonads) (Fig 1D). This result shows for the first time  
173 sex-specific expression of miRNAs in the *C. elegans* germline.

174

175 The comparison of hermaphrodite and feminized males permits to also  
176 identify the contribution of the somatic gonad to differences in sex expression  
177 between hermaphrodite and male gonads, since germlines are identical (both  
178 female). This comparison revealed that 16 of the 37 miRNAs with sex-biased  
179 gonad expression were differentially expressed between the hermaphrodite  
180 and feminized gonads. One miRNA was more highly expressed in  
181 hermaphrodites, and 15 miRNAs were more highly expressed in feminized  
182 males, indicating sex-differences that stem from the somatic gonad (see  
183 additional file 1 Fig S1).

## 184 **piRNAs with sex-biased expression**

185 Next, we compared hermaphrodite and male gonads to identify type I and II  
186 piRNAs with sex-biased expression. Our cloning technique allowed us to  
187 capture (5'-monophosphate-) piRNAs, yet at lower frequency than other types  
188 of (5'-triphosphate-) siRNA. We detected sense reads of 4004 annotated  
189 piRNAs [36,51] in hermaphrodite gonads and 5390 in male gonads, including  
190 3168 piRNAs present in both sexes (Fig 1E, additional file 2). To uncover  
191 putative quantitative differences in piRNA expression between sexes, we  
192 compared normalized read counts between hermaphrodite and male gonads.  
193 Using a cutoff of four-fold difference in abundance and a false-discovery rate  
194 of 1% revealed 66 piRNAs with hermaphrodite-biased expression and 919  
195 piRNAs with male-biased expression (Fig 1F). piRNAs are germline specific,  
196 and previous studies have identified male- and hermaphrodite-specific  
197 piRNAs by sequencing of whole animals or purified gametes [36,37,52]. We  
198 identified 93% of the previously identified male- and 32% of the female-biased  
199 piRNAs in another study [52] despite differences between the two (i.e., cell  
200 type, genotype, cloning technique and statistics). Thus, our method captures  
201 differences in piRNA expression with more sex-specific piRNAs in males than  
202 in hermaphrodites, further suggesting sex-specific regulatory mechanisms.

203

## 204 **Endogenous siRNAs with sex-biased germline expression**

205 As a third group of endogenous small RNA, we focused on siRNAs expressed  
206 in gonads of both sexes. We analysed all siRNAs that map to protein coding  
207 genes with a minimum of five mean antisense reads, thus excluding mRNA  
208 degradation products with sense orientation. This revealed 8714 genes with



209 siRNAs in hermaphrodite gonads and 10615 genes in male gonads (Fig 1G).  
210 7675 of these siRNA targeted genes were found in both sexes (Fig 1G;  
211 additional file 2). Additional expression data of small RNA (antisense and  
212 sense) mapping to other annotated features in the genome such as  
213 pseudogenes, transposons and different types of small RNA for gonads of  
214 both sexes is available as additional file 2.

215

216 To detect potential quantitative expression differences between sexes, we  
217 compared normalized antisense read counts per gene between  
218 hermaphrodite and male gonads, selecting only genes with at least a four-fold  
219 difference in siRNA abundance and a false-discovery rate of 1%. 4508 genes  
220 exhibited a sex-biased expression of siRNAs: 1138 were higher expressed in  
221 hermaphrodites and 3370 were higher expressed in males. siRNAs of 68  
222 genes were detected exclusively in hermaphrodites and 748 only in males.

223

224 To determine whether these expression differences stem from the germline or  
225 the somatic gonad, we again made use of the *fog-3* mutants. Of the 4508  
226 genes with sex-biased siRNAs expression in the gonad, 3173 were also  
227 differentially expressed between the gonads of control males and feminized  
228 males. siRNAs mapping to 2245 genes were more highly expressed in the  
229 male gonads, and 928 were more highly expressed in the feminized male  
230 gonads (Fig 1H). Thus, most of the sex-differences between hermaphrodite  
231 and male gonads stem from expression differences in the germline proper.

232

233 To relate sex-differences in germline siRNA expression to biological  
234 processes, we carried out gene set enrichment analysis using WormExp v1.0  
235 [53]. This tool queries *C. elegans* mRNA and siRNA expression data in  
236 functional groups called 'gene sets' based on individual experiments for  
237 statistically significant overlap with a given gene list. We predicted that genes  
238 with sex-biased germline siRNA expression (i.e., 928 hermaphrodite- and  
239 2245 male-biased genes) may overlap with gene sets corresponding to  
240 germline mRNA or siRNA expression. For statistical analysis, we compared  
241 enrichment to all 18106 genes with siRNAs detected. From the selected 912  
242 gene sets queried (WormExp categories: mutants, tissue, other), there was  
243 significant overlap in both sexes with multiple gene sets related to germline  
244 mRNA expression (such as down-regulation in germline-less *glp-1* mutant;  
245 here and in the following comparisons  $p < 0.001$ ) and siRNA regulation (such  
246 as alteration in *csr-1*, *rde-1* and *rrf-3* mutants). In addition, this analysis  
247 revealed sex-specific overlap with several prior siRNA experiments. Genes  
248 with hermaphrodite-biased germline siRNA expression overlapped with siRNA  
249 targets detected in whole animals, for example those regulated by *rde-8*,  
250 *ergo-1*, *eri-6/-7*, *mut-16*. Likewise, genes with male-biased germline siRNA  
251 expression overlapped with spermatogenesis specific *alg-3/-4* targets. Thus,  
252 as expected, gonadal siRNAs with tissue-and sex-specific expression are  
253 involved in germline and siRNA functions, confirming the specificity of our  
254 approach.

255

256 **High 22G RNA levels are associated with low mRNA expression,**  
257 **compatible with silencing**

258 Since 22G RNAs of several biogenesis pathways induce gene silencing, we  
259 determined the relative abundance of 22G RNAs in the gonads of both  
260 hermaphrodites and males. 22G RNAs represented 27.4% of reads in the  
261 hermaphrodite gonads and 27.9% of reads in the male gonads (additional file  
262 1 Fig S2A). The 22G RNA levels per gene were not significantly different  
263 between the male (mean reads  $234.4 \pm 1432.9$ ) and hermaphrodite gonads  
264 ( $173.2 \pm 857.8$ ; additional file 1 Fig S2B).

265

266 To gain insights into 22G RNA-mediated mRNA silencing in gonads, we  
267 tested if there was an association of 22G RNAs and corresponding mRNA  
268 template expression. If mRNA induces 22G RNA synthesis, there should be a  
269 positive correlation between the levels of mRNA and 22G RNA. Alternatively,  
270 if 22G RNA expression causes mRNA silencing, a negative correlation  
271 between the levels of mRNA and 22G RNA is expected. Data on gonadal  
272 mRNA expression in both *C. elegans* sexes was available from a previous  
273 study [54]. We first grouped genes in 20 bins according to their 22G RNA  
274 expression level. Across bins, there was a positive association between the  
275 levels of 22G RNA and gonadal mRNA for groups of genes with low and  
276 medium levels of 22G RNA (Fig 2). In contrast, in both hermaphrodites and  
277 males, the level of mRNA decreased with extremely high 22G RNA levels (Fig  
278 2), a pattern suggestive of silencing. For statistical analyses we next grouped  
279 genes in 5% intervals with equal number of genes again according to 22G  
280 RNA expression (additional file 1 Fig S3A). The most significant negative  
281 association between the levels of 22G RNA and mRNA was found only for the  
282 5% of the genes with highest level of 22G RNA expression (hermaphrodites

283  $p=1 \times 10^{-12}$ , males  $p=1 \times 10^{-16}$ ; additional file 1 Fig S3B). These data indicate that  
284 mRNA expression is globally decreased for genes with very high levels of  
285 22G RNAs. In conclusion, the negative correlation of 22G RNA and mRNA  
286 expression in *C. elegans* gonads is suggestive of siRNA mediated gene  
287 silencing.

288

### 289 **Germline sex regulates environmental siRNA accumulation**

290 Since endogenous siRNA pathways share secondary siRNAs owing to similar  
291 biogenesis routes [16,18,30], we cannot experimentally determine the fraction  
292 of 22G RNA induced by a specific primary siRNA type. To compare  
293 expression levels of both primary and secondary siRNA and their impact on  
294 protein expression, we developed a sensor based assay. To this end, we  
295 used a germline expressed GFP-sensor [55] targeted by *gfp(RNAi)*.  
296 Environmental *gfp* dsRNA provided by feeding allows one to manipulate  
297 primary siRNA levels and thus directly measure the impact of altered levels of  
298 primary siRNA on secondary siRNA levels. To distinguish exogenous primary  
299 siRNAs from worm-generated secondary siRNAs, we generated *gfp* dsRNA  
300 with single-nucleotide-polymorphisms (SNPs) every 21 nucleotides relative to  
301 the GFP-sensor transgene. Thus, primary siRNAs can be discriminated from  
302 secondary siRNAs (Fig 3A). To investigate potential sex-specific regulation of  
303 siRNA levels during exogenous RNAi, we quantified primary and secondary  
304 siRNAs by sequencing siRNAs from gonads of males and hermaphrodites  
305 expressing the GFP-sensor. Uptake and primary siRNA processing were  
306 active in both male (9 siRNA/  $10^6$  reads) and hermaphrodite gonads (6 siRNA/  
307  $10^6$  reads). Moreover, primary siRNA levels were not statistically different

308 between the sexes (t-test  $p=0.08$ , Fig 3B). By contrast, the secondary siRNA  
309 level was significantly lower in the male (82 siRNA/ $10^6$  reads) than  
310 hermaphrodite gonads (280 siRNA/ $10^6$  reads, t-test  $p=4.3 \times 10^{-3}$ , Fig 3B).  
311 Accordingly, the ratio of secondary siRNA/ primary siRNA was significantly  
312 lower in the male gonads compared to the hermaphrodite gonads  
313 (respectively, 9 and 56 secondary siRNA/primary siRNA, t-test  $p=0.03$ , Fig  
314 3B). Taken together, we conclude that environmental supplied dsRNA triggers  
315 primary and secondary siRNA production in the germline, with notably higher  
316 levels of secondary siRNA products in hermaphrodites than in males. The  
317 presence of primary siRNAs in the male germline establish that uptake and  
318 transport of silencing agents (such as dsRNA or primary siRNA) from the  
319 environment across male somatic tissues, notably the somatic gonad, is  
320 functional.

321

### 322 **RNAi efficacy is germline sex dependent**

323 Anecdotal evidence suggests that germline RNAi silencing may differ between  
324 *C. elegans* hermaphrodites and males. RNAi in hermaphrodite germlines is  
325 extremely potent as depletion phenotypes often appear within 24 hours of  
326 dsRNA exposure [45], even at reduced dsRNA dose [44]. In contrast, similar  
327 experiments generally provide negative RNAi results in male germlines  
328 [43,46,48]. Presumably stronger RNAi depletion occurs in male germlines  
329 directly injected with high doses of dsRNA [56], or by exposing the parental  
330 generation [57–60]. However, direct comparison of silencing efficacy of  
331 endogenous genes solely based on phenotypes in germlines of  
332 hermaphrodites and males is insufficient, notably due to sex differences in

333 physiology and gene function. Feeding dsRNA triggers against the expressed  
334 GFP-sensor allows one to measure and compare siRNA levels and resulting  
335 RNAi silencing in hermaphrodites and males raised in the same environment.  
336 The observed difference in siRNA amplification products observed above (see  
337 Fig 3) prompted us to ask whether germline sex affects RNAi silencing. To  
338 assess RNAi silencing in both sexes, we monitored the presence or absence  
339 of GFP-sensor fluorescence upon *gfp(RNAi)* (Fig 4A). These analyses  
340 revealed that germline silencing by dsRNA is sex specific. Of the 307  
341 hermaphrodites analysed, 305 (99.4%) silenced the germline GFP-sensor  
342 (Fig 4B), in contrast to only 3 (3.7%) of the 81 males analysed (chi-square  
343  $p < 0.001$ ; Fig 4B). This difference pertained to the entire germline of males  
344 since GFP-sensor expression was visible in proliferating germ cells and  
345 differentiated spermatocytes (Fig 4A). Contrary to the germline, the soma of  
346 males was RNAi sensitive, as evidenced by the complete silencing of a  
347 ubiquitous GFP-sensor [61] in all non-neuronal somatic cells (Fig 4C; 60/60  
348 males). This is in line with successful RNAi-based screens targeting somatic  
349 tissues in male, notably the somatic gonad [62,63] and shows that somatic  
350 RNAi efficacy is sex independent. Thus, isogenic worms raised in the same  
351 environment show phenotypic differences in response to environmental cues.  
352 Since RNAi silencing is dependent on the dsRNA levels and because mutants  
353 defective in siRNA amplification are partly RNAi resistant [16,64–66], the  
354 observed sex-difference in secondary siRNA abundance in gonads (Fig 3B)  
355 may explain the difference between sexes in germline RNAi efficacy (Fig 4A  
356 and 4B).

357

358 **RNAi efficacy is germline sex dependent**

359 To determine whether the observed differences in germline RNAi silencing  
360 between male and hermaphrodites was induced by differences in the germline  
361 or the soma, we again made use of the feminized males. All other traits of the  
362 feminized males such as soma, karyotype and feeding-behaviour are  
363 undistinguishable from wild-type males (Fig 4B). Upon feeding *gfp(RNAi)*, all  
364 106 feminized males silenced the GFP-sensor (Fig 4A, B), indicating that  
365 germline-intrinsic factors regulate RNAi silencing, rather than other male traits  
366 such as the soma, karyotype or behaviour.

367

368 To test whether differences in germline RNAi silencing between control and  
369 feminized mutant male gonads could stem from altered siRNA levels or  
370 altered downstream silencing activities, for instance target slicing by  
371 Argonautes, we compared siRNA levels in gonads. The gonads of feminized  
372 males contained higher levels of primary *gfp* siRNAs (74 siRNA/10<sup>6</sup> reads, t-  
373 test  $p=9.5 \times 10^{-4}$ ) and secondary *gfp* siRNAs (798 siRNA/10<sup>6</sup> reads, t-test  
374  $p=0.04$ ) than control male gonads (additional file Figure S4). Since RNAi  
375 silencing is dose-dependent, the higher siRNA levels in feminized mutant  
376 compared to male gonads are a plausible explanation for the sex-difference in  
377 germline RNAi silencing.

378

379 To examine whether the male germline RNAi resistance was inherent to  
380 sperm or influenced by the surrounding germline environment, we compared  
381 RNAi silencing between the sperm of males and hermaphrodites. If the  
382 germline environment regulates RNAi, silencing should differ between the

383 sperm of males and hermaphrodites. By contrast, if the sperm physiology  
384 confers RNAi resistance, both types of sperm should be RNAi resistant. We  
385 measured fluorescence intensities of a GFP-sensor [67] on chromatin using  
386 both types of sperm imaged in whole worms fed with *gfp(RNAi)*. This  
387 experiment revealed RNAi silencing in hermaphrodite sperm, since *gfp(RNAi)*  
388 significantly decreased sperm GFP signal intensity by a mean of  $81.9\% \pm 5.1\%$   
389 compared to animals not exposed to dsRNA (Fig 4D; t-test  $p=1.8 \times 10^{-6}$ ). By  
390 contrast, the sperm of males was completely RNAi resistant, with the GFP-  
391 sensor signal intensity being not significantly different between males fed with  
392 *gfp(RNAi)* and males not being exposed to dsRNA (Fig 4D; t-test  $p=0.2$ ).

393

394 The finding that, in contrast to sperm in males, sperm from hermaphrodites is  
395 RNAi sensitive, indicates that the surrounding germline environment plays a  
396 crucial role in RNAi silencing of sperm. Because germ cell precursors for  
397 sperm and oocytes grow in the same syncytium in hermaphrodites, silencing  
398 agents such as siRNAs or RNAi proteins produced in oocytes may diffuse in  
399 the germline and thus influence silencing in sperm. To test this hypothesis, we  
400 investigated whether mutant hermaphrodites producing only sperm initiate  
401 RNAi independently of oogenic germ cells using the gain-of-function allele  
402 *fem-3(q96)* [68]. We found that such sperm were RNAi sensitive, since  
403 fluorescence GFP-sensor [67] signal intensity was on average  $74.8\% \pm 19.9\%$   
404 lower in *fem-3* worms fed *gfp(RNAi)* compared to animals not exposed to  
405 RNAi (Fig 4D; t-test  $p=3.0 \times 10^{-7}$ ). Thus, the sperm of hermaphrodites is RNAi  
406 sensitive even in the complete absence of oogenic germ cells in the  
407 syncytium.



408

## 409 **DISCUSSION**

410 Here we provide the first comprehensive small RNA profile of isolated *C.*  
411 *elegans* male and hermaphrodite gonads and show qualitative as well as  
412 quantitative sex-differences in siRNA expression for both somatic gonad and  
413 germline tissue. We demonstrate tissue-specific sex-differences in response  
414 to environmental RNAi triggers: in contrast to the hermaphrodite germline, the  
415 male germline is resistant to silencing and accumulates lower levels of RNAi  
416 amplification products. Taken together, these results provide a mechanistic  
417 explanation for sex-differences in RNAi efficacy in response to the  
418 environment with implications for trans-generational inheritance.

419

### 420 **Sex-differences in gonadal miRNA, piRNA and siRNA expression**

421 miRNA regulation, notably via the conserved miR-35 family is crucial for the  
422 embryonic viability, proliferation of the germline and is implicated in sex-  
423 determination [27,28,41,69]. In addition, miRNAs expressed in the *C. elegans*  
424 somatic gonad maintain germline proliferation and differentiation [41]. We  
425 identified female germline-biased expression of the miR35-41 cluster in  
426 isolated gonads, which is in line with studies conducted on whole animals  
427 [27,29,70].

428

429 The transgene reporter for miR-246 expression, which typically escapes  
430 germline expression, was previously observed in hermaphrodite gonadal  
431 sheath cells [23]. Here we establish sex-biased expression of endogenous  
432 miR-246 specifically in the hermaphrodite somatic gonad as opposed to the

433 germline or the male gonad. Since miR-246 expression positively correlates  
434 with lifespan [71,72], it will be interesting to identify miR-246 targets in the  
435 somatic gonad or germline. Thus, small RNA sequencing of isolated gonads  
436 and comparison of expression differences between wild-type and sex-  
437 transformed mutant gonads captures known sex-differences in expression  
438 and in addition provides more detailed, tissue-specific information.

439

440 Our data provide the first tissue-specific analysis of miRNA expression in  
441 males. Of the 46 male-biased miRNAs with searchable names in miRBase  
442 detected in whole animals [24], 13 miRNAs showed male-biased gonad  
443 expression, underlining the importance of a tissue-specific approach. Thus,  
444 sex-biased miRNA expression occurs in both soma and gonad. Some  
445 miRNAs with male-biased gonad expression were previously not detected as  
446 sex-biased [24] and could have been masked by somatic expression in both  
447 sexes.

448

449 In contrast to miRNAs, the piRNA pathway acts exclusively in the germline.  
450 Since the germline makes up about half of the adult *C. elegans* cells [73],  
451 whole worm sequencing is a good proxy for germline-restricted piRNA  
452 expression. Our analysis of sex-biased piRNA expression thus complements  
453 previous studies on whole animals that reported distinct piRNA expression in  
454 hermaphrodites and males [24,37]. While the cloning method applied here  
455 causes relatively low (5'-monophosphate) piRNA detection level compared to  
456 whole animals [37], it also causes preferential cloning of 5'-triphosphate RNA  
457 species and thus high coverage of endogenous siRNA. The tissue-specific

458 analysis of endogenous 22G RNA and mRNA identified transcripts that are  
459 potentially regulated by RNAi. Importantly, hermaphrodites and males share  
460 common as well as distinct siRNA targeted gene sets in gonadal tissue. Most  
461 gonadal sex-differences in siRNA expression stem from the germline, which  
462 represents the vast majority of the gonadal tissue. Further comparison of  
463 gonadal siRNA and corresponding mRNA uncovers uncoupling of siRNA and  
464 mRNA levels, indicative of RNAi silencing. It will be interesting to investigate  
465 this regulation in the future.

466

#### 467 **RNAi efficacy is regulated by germline sex**

468 Our study provides novel insights into how the sex of an animal influences  
469 RNA-induced environmental changes in the phenotype. In particular, using  
470 environmental dsRNA triggers, we demonstrated that RNAi resistance affects  
471 exclusively the male germline. Sequencing primary and secondary siRNA with  
472 unique SNPs in isolated gonads from males and hermaphrodites allowed us  
473 to quantitatively compare steady-state levels. We detected similar levels of  
474 primary siRNAs in gonads of both sexes, suggesting functional transport of  
475 RNAi trigger from the environment to the soma and processing of primary  
476 siRNA in the male germline. In contrast, we discovered low levels of  
477 secondary siRNA amplification products in males compared to  
478 hermaphrodites. Thus, RNAi resistance in the male germline affects  
479 downstream processes that likely impact sex-differences in secondary siRNA  
480 processing or siRNA stability. It follows that RNAi is generally not suitable for  
481 functional studies of the *C. elegans* male germline if provided during one

482 generation only. Since RNAi silencing is efficient in sperm of hermaphrodites,  
483 such animals are more suitable for reverse genetics targeting the germline.

484

485 What determines the sex-differences of gene regulation in response to  
486 environmental cues? It is conceivable that known or novel RNAi regulators  
487 impact germline gene regulation by modulating RNAi efficacy. A potential  
488 candidate is the endoribonuclease RDE-8 which is expressed predominantly  
489 in hermaphrodite germlines and is essential for amplification of siRNA  
490 products and silencing [66]. Thus, RNAi resistance in male germlines may  
491 possibly be linked to reduced RDE-8 activity. Also, sex-differences in  
492 localization may affect RNAi efficacy. Notably CID-1, a poly(U)-polymerase  
493 modulating germline RNAi efficacy shows distinct subcellular localization in  
494 male and female germlines – perinuclear, respectively chromosomal- that  
495 may affect function [74]. Intriguingly, in addition, multiple sex-differences are  
496 well described for the Argonaute CSR-1 that targets endogenous germline  
497 transcripts via secondary 22G RNAs [19,34]. First, males and hermaphrodites  
498 express distinct CSR-1 isoforms [34,73]. Second, *csr-1* mutant  
499 hermaphrodites are mostly sterile, while *csr-1* mutant males show only  
500 modestly reduced fertility over multiple generations [33,75]. Third, CSR-1  
501 bound 22G RNAs target distinct sets of transcripts in male and hermaphrodite  
502 [33,75]. Thus, sex-differences in CSR-1 function may contribute to the  
503 observed sex-difference in RNAi sensitivity, in line with CSR-1 function in  
504 germline RNAi [76]. Overall, multiple mechanisms may contribute to sex-  
505 specific gene regulation and untangling the individual contributions will  
506 provide exiting answers on male and female biology.

507

508 In conclusion, this study provides the tissue-specific small RNAome of *C.*  
509 *elegans* hermaphrodite and male gonads and identifies quantitative sex-  
510 differences in miRNA, piRNA and siRNA expression. Furthermore, we  
511 demonstrate that the male germline is resistant to RNAi triggers taken up from  
512 the environment and accumulates lower levels of RNAi amplification products.  
513 We thus provide mechanistic insights into sex-differences of gene regulation  
514 in response to environmental cues that may play a role in transgenerational  
515 inheritance.

516

## 517 **MATERIAL AND METHODS**

### 518 **Nematode strains**

519 *C. elegans* strains of the following genotype were cultured according to  
520 standard procedures [77]: *him-8(e1489)* IV [77], *fog-3(q849[E126K])*  
521 *l/ hT2[qIs48]* (I;III); (kind gift from Scott Aoki and Judith Kimble) and *fem-*  
522 *3(q96)* IV [68]. The following GFP-sensors were used: single copy  
523 *mjIs145* [mex-5p::GFP::his-58::21UR-1sense::tbb-2 3'UTR] II (Bagijn 2012;  
524 Figure 1, 2, 3, 4A, B), multicopy *adIs2122* [lgg-1p::GFP::lgg-1 3'UTR + rol-  
525 6(su1006)] [61]; Figure 4C) and multicopy *zuls178* [*his-72p::his-72::GFP::his-*  
526 *72 3'UTR*] ([67]; Figure 4D). All strains were wild-type for *mut-16(mg461)* by  
527 PCR [78]. *him-8(e1489)* was used to generate otherwise wild-type males and  
528 hermaphrodites, for simplicity we refer to such animals as 'control males' and  
529 'control hermaphrodites'.

530

### 531 **RNA interference**

532 RNAi feeding plates were prepared from freshly streaked HT115 bacteria  
533 containing L4440 vector according to [79]. Those were used to feed  
534 synchronized L1 worms minimum 48h at 20°C unless otherwise stated. Initial  
535 *gfp(RNAi)* experiments were carried out with a construct targeting the full *gfp*  
536 coding sequence including three introns. The recoded *gfp(RNAi)* with SNP  
537 every 21 nucleotides targets only exons and was synthesized by Integrated  
538 DNA Technologies and cloned into the L4440 plasmid. Silencing efficiency of  
539 recoded *gfp(RNAi)* is slightly reduced compared to full length *gfp(RNAi)*,  
540 which may be caused by SNPs or lacking exons.

541

#### 542 **Microscopy**

543 RNAi silencing was scored in live adults mounted on slides with reaction wells  
544 (Paul Marienfeld) using 20x or 40x objective on a Zeiss Axio Scope.A1  
545 microscope. Worms scored as RNAi sensitive on a binary scale if GFP-sensor  
546 was absent or greatly diminished as compared to animals treated with empty  
547 vector RNAi. Differential interference contrast (DIC) and fluorescence images  
548 were acquired on a AxioCam 506 mono CCD camera and processed with Fiji  
549 software [80]. Outlines of the germlines were drawn on the DIC image in  
550 Adobe Illustrator.

551

#### 552 **Gonad isolation and replicates**

553 Bleach-synchronized L1 worms were grown on RNAi bacteria 48h at 20°C  
554 until L4/ young adult, then washed 5 times in 15mL M9 to remove bacteria  
555 and grown overnight at 20°C on OP50 bacteria. Prior dissection, adults were  
556 picked on empty plates and transferred in groups of 3-4 in a drop of 0.01%

557 levamisole + sperm buffer [81] to wash and paralyze animals. Animals were  
558 cut with a 21G needle behind the pharynx to liberate the gonad in a new drop  
559 of buffer on a depression slide (cavity 15-18mm, depth 0.6-0.8 mm;  
560 Marienfeld). Non-gonadal somatic tissue was removed, including the intestine;  
561 the spermatheca was removed from hermaphrodite gonads. Using a mouth  
562 pipette with glass capillary gonads were transferred to a tube with RNAlater  
563 (50-100µl) and after TRIzol (Thermo Fisher) addition frozen at -80°C.

564

565 Gonads from hermaphrodites (100), males or *fog-3* males (each 200) were  
566 processed as independent replicates for sequencing as follows (# replicates;  
567 including # recoded *gfp(RNAi)* samples): hermaphrodites (6;4), males (3;2)  
568 and *fog-3* males (2;2). Since endogenous siRNAs levels were not different  
569 from germlines treated with or without *gfp(RNAi)*, both were used for sex-  
570 biased expression analysis.

571

## 572 **RNA extraction**

573 RNA was extracted with 1 ml of TRIzol according to manufacturer's protocol.  
574 Briefly, RNA was precipitated adding 1 volume of isopropanol and 20 µg  
575 glycogen (Roche). Samples forming a white precipitate at this point were  
576 cleared by addition of 500 µL isopropanol: water 50 % (v/v). Samples were  
577 frozen at -80°C, thawed on ice and RNA was pelleted by centrifugation for 30  
578 min at +4°C, 16000 g. The pellet was washed in ice cold 70% (v/v) ethanol  
579 and recovered by centrifugation for 20 min at +4°C, 16000 g and finally  
580 resuspended in 10 µL water. RNA concentration was determined by Qubit®  
581 RNA BR Assay Kit (Thermo Fisher).

582

583 **5' independent library preparation and sequencing**

584 For RNA dephosphorylation 400 ng of RNA were treated with 20 Units of 5'  
585 polyphosphatase (Epicenter) in 20 µL reaction volume, purified using acid-  
586 phenol-chloroform, pH 4.5 (Thermo Fisher) and isopropanol precipitated using  
587 20 µg of glycogen. Subsequently, RNA was suspended in 6 µL water and  
588 directly used for TruSeq Small RNA library kit (Illumina) following the  
589 manufacturer's instructions with exception that 15 cycles of PCR amplification  
590 were used. The cDNA libraries were separated on 6% TBE PAGE gels (Life  
591 Technologies) and bands with 147- 157 nucleotides were cut from the gel.  
592 The gel matrix was broken by centrifugation through gel breaker tubes (IST  
593 Engineering Inc.) and size-selected cDNA eluted with 400 µl of 0.3M Na-  
594 Chloride. cDNA was purified by centrifugation through Spin-X 0.22µm  
595 cellulose acetate filter columns (Costar) followed by isopropanol precipitation.  
596 Libraries were sequenced on a HiSeq 1500 Sequencer (Illumina).

597

598 **Computational analysis of small RNA high-throughput sequencing data**

599 Small RNA sequencing results were obtained from  
600 <https://basespace.illumina.com/> as fastq files after demultiplexing. Sequencing  
601 data is available in the European Nucleotide Archive under accession number  
602 PRJEB12010. Firstly, adapter sequences, reads shorter than 21 nucleotides  
603 (nt) and reads longer than 34 nt were removed using cutadapt v1.9.1.  
604 Secondly, the remaining reads were aligned using bowtie 1.1.2 with at most 2  
605 mismatches to *Escherichia coli* str. K-12 MG1655. Thirdly, the remaining  
606 reads were aligned with at most 2 mismatches to *C. elegans* WS235 tRNAs



607 and rRNAs. Fourthly, the remaining reads were aligned with no mismatches to  
608 the worm *gfp* sequence. Fifthly, the remaining reads were aligned with no  
609 mismatches to the recoded *gfp* sequence. Sixthly, the remaining reads were  
610 aligned with no mismatches to *C. elegans* miRNAshairpins (miR-base release  
611 21). Seventhly, the remaining reads were aligned with no mismatches to *C.*  
612 *elegans* genome cel235. Overall, we obtained ~2.3 – 12.8 million trimmed  
613 reads mapping to the genome (WS235) for each sex. endo-siRNAs was  
614 quantified per gene, antisense reads mapping to coding exons, which account  
615 for more than 96% of reads in this class.

616

617 Silencing of mRNA targeted by very high levels of 22G RNA:

618 Fastq-mcf ( Erik Aronesty (2011). ea-utils : "Command-line tools for  
619 processing biological sequencing data";  
620 <https://github.com/ExpressionAnalysis/ea-utils> ) was used to trim adapters  
621 from single-end reads. Bowtie 1.1.2 (parameters "--best --strata --tryhard -m  
622 1") (Langmead B, Trapnell C, Pop M, Salzberg SL. [Ultrafast and memory-](#)  
623 [efficient alignment of short DNA sequences to the human genome.](#) *Genome*  
624 *Biol* 10:R25.) was used to map single-ended reads to *C. elegans* WS250  
625 genome. Reads were classified as 22G/26G based on length and starting  
626 base. HTSeq 0.6.0 (Simon Anders, Paul Theodor Pyl, Wolfgang Huber  
627 *HTSeq — A Python framework to work with high-throughput sequencing data*  
628 Bioinformatics 2014) was used to generate counts for reads that map to  
629 WS250 features in the sense and antisense directions. Reads mapping  
630 against transposons were retrieved using  
631 `c_elegans.PRJNA13758.WS250.annotations.exons.genes.with_transposons.`

632 gff. Features counts from separate samples were normalized and differences  
633 in expression were determined using DESeq2 1.13.8 (Love MI, Huber W and  
634 Anders S (2014). “Moderated estimation of fold change and dispersion for  
635 RNA-seq data with DESeq2). Because alternative biological processes  
636 generate sense and antisense mapping reads, reads mapping in the sense  
637 direction from each library were normalized together, likewise reads mapping  
638 in the antisense direction were separately normalized. The cutoff for sex-  
639 biased expression was >4 fold difference in abundance and adjusted p-value  
640 <0.01. For correlations with germline transcriptome, data was used from West  
641 et al., Genome Biology 2017 (Sequence Read Archive, accession number  
642 SRP096640). For miRNAs both star and non-star sequences from the same  
643 gene were summed.

644

645 Assay and quantification of primary and secondary *gfp* siRNA levels: Reads  
646 were trimmed with cutadapt v1.9.1. Bacteria, tRNA and rRNA reads  
647 contaminations were removed using bowtie 1.1.2 alignment to the *Escherichia*  
648 *coli* str. K-12 MG1655 and to *C. elegans* WS235 tRNAs and rRNAs.  
649 Remaining reads were aligned with no mismatches to the worm *gfp*  
650 sequence. Then the remaining reads were aligned with no mismatches to the  
651 recoded *gfp* sequence.

652

### 653 **LIST OF ABBREVIATIONS**

654 RNA interference (RNAi)

655 Nucleotide (nt)

656 RNA-induced silencing complex (RISC)

657 RNA-dependent RNA polymerases (RdRP)

658 PIWI bound small RNA (piRNA)

659 Green fluorescent protein (gfp)

660 Single-nucleotide-polymorphism (SNP)

661

## 662 **DECLARATIONS**

### 663 **Ethics approval and consent to participate**

664 Not applicable.

### 665 **Consent for publication**

666 Not applicable.

### 667 **Availability of data and material**

668 Small RNA library sequencing data is available on the European Nucleotide

669 Archive in the Study: PRJEB12010. A sample description can be found in

670 additional file 3.

### 671 **Competing interests**

672 The authors declare that they have no competing interests.

### 673 **Funding**

674 This work was funded by grants from the Swiss NSF and an advanced ERC

675 grant to LK, grants from Cancer Research UK (C13474/A18583,

676 C6946/A14492) and the Wellcome Trust (104640/Z/14/Z, 092096/Z/10/Z) to

677 EAM, and grants from the National Institutes of Health to SW (NIGMS NHRA

678 5F32GM100614) and to FP and KCG (NHGRI U01 HG004276, NICHD R01

679 HD046236), and by research funding from New York University Abu Dhabi to

680 FP and KCG.

681 **Authors' contributions**

682 AB and FB contributed equally to experimental design, collected data,  
683 analysed and interpreted results, and drafted the manuscript. SW contributed  
684 to analysis design and interpretation of data and results. RC and AD  
685 contributed to cloning and data collection with GFP-sensor strains. FS  
686 provided statistical analysis for Fig 2. PG, KG and FP were involved in the  
687 conception and design of experiments and analyses. LK and EAM contributed  
688 to design of experiments and analyses, results interpretation and drafting the  
689 manuscript. All authors read and approved the final manuscript

690

691 **Acknowledgements**

692 We are grateful to Scott Aoki and Judith Kimble for sharing strains prior to  
693 publication, Benita Wolf, Adria LeBoeuf and Tamara Mikeladze-Dvali for  
694 comments on the manuscript and Gönczy lab members for advice. We thank  
695 Kay Harnish of the Gurdon Institute Sequencing Facility for managing the  
696 high-throughput sequencing, Nazife Bega for media preparation and  
697 Wormbase. Some strains were provided by the CGC, which is funded by NIH  
698 Office of Research Infrastructure Programs (P40 OD010440).

699

700 **FIGURE LEGENDS**

701 **Figure 1:** Tissue- and sex-specific small RNA profiling

702 A) Small RNA types in *C. elegans* categorized by template (DNA or  
703 RNA), length and first nucleotide (nt). Distinct primary small RNA types  
704 (orange) induce the amplification of secondary 22G RNAs (green) by  
705 RNA-dependent RNA polymerase (RdRP) using mRNA as a template.

706 B) Small RNAs were sequenced from dissected adult *C. elegans* gonads  
707 containing germline and somatic gonad tissue. Control hermaphrodites  
708 and males have sex-specific germline and somatic gonad tissue (red:  
709 female traits; blue: male traits). Mutant *fog-3* males have a 'female'  
710 germline (red) and a male somatic gonad (blue).

711 C,E,G) Gonad expression of miRNA (C), piRNA (E) and endogenous  
712 siRNA (G, >5 mean reads) in control hermaphrodites (red circle, n=6  
713 replicates) and males (blue circle n=3). Total number of gonadal small  
714 RNAs in each sex is shown as well as the overlap.

715 D,F,H) Sex-differences in expression of mean normalized miRNA (D),  
716 piRNA (F) and endogenous siRNA (H) reads in hermaphrodite (n=6  
717 replicates) and male gonads (n=3). (D,H) miRNA and siRNA  
718 expression-differences with four-fold difference in abundance that were  
719 statistically different (Wilcoxon rank sum test with continuity correction;  
720 p adjusted<0.01) between hermaphrodites and males as well as  
721 between control males and *fog-3* males (n=2) are highlighted in red  
722 (female germline-biased) and blue (male germline-biased). (F) Since  
723 piRNA are germline-specific, expression-differences between  
724 hermaphrodites and males (n=2) are highlighted in red (female  
725 germline-biased) and blue (male germline-biased) without comparison  
726 to *fog-3*. See additional file 1 Fig S1 for sex-differences in somatic  
727 gonad expression.

728

729 **Figure 2:** High 22G RNA levels are associated with low mRNA expression,  
730 compatible with silencing

731 Mean normalized mRNA [54] and 22G RNA reads detected in  
732 hermaphrodite and male gonads (data in 20 bins according to 22G  
733 RNA level; number of genes per bin: 4 – 1101 in hermaphrodites, 5 –  
734 1343 in males; mean: solid line, outliers: open circles). mRNA  
735 expression is globally decreased for the top 5% of genes (shaded area)  
736 with high levels of 22G RNA. See additional file Fig S3 for statistical  
737 analysis.

738

739 **Figure 3:** Sex-differences in gonadal siRNA levels during germline RNAi  
740 silencing.

741 A) Assay to quantify primary and secondary siRNA levels (from dissected  
742 gonads from hermaphrodites and males; see Fig 1B). Animals  
743 expressing the GFP-sensor in the germline were raised on *gfp(RNAi)*  
744 containing SNPs (black square) each 21 nucleotides. Primary siRNAs  
745 (orange) are identified by the presence of the SNPs, while secondary  
746 siRNAs (green) lack SNPs.

747 B) Mean primary and secondary siRNA reads normalized to total reads in  
748 gonads from hermaphrodites (circles indicate replicates, n=4) and  
749 males (n=2). Animals raised on *gfp(RNAi)* or control empty vector  
750 (hermaphrodite n=2, male n=1). Mean secondary siRNA/ primary  
751 siRNA ratio only shown for RNAi treated animals. T-test was applied  
752 for significance test; \* = p<0.05, \*\*\* = p<0.001.

753

754 **Figure 4:** Sex-differences in germline RNAi efficacy.

- 755 A) Fluorescence microscopy images of germline (dotted line) GFP-sensor  
756 expression in hermaphrodites, males and *fog-3* males (left). Silencing  
757 of the GFP-sensor upon *gfp(RNAi)* in hermaphrodite and *fog-3* male  
758 germlines, while control male germlines are RNAi resistant (right). Gut  
759 autofluorescence is visible outside the germline.
- 760 B) Percentage of worms ( $\pm$ SEM) silencing the GFP-sensor in the germline  
761 upon *gfp(RNAi)* (n=307 hermaphrodites, 81 males, 106 *fog-3* males).  
762 Chi-square test was applied; \*\*\* =  $p < 0.001$ . Table with hermaphrodite/  
763 female (red) and male (blue) traits in hermaphrodites, males and *fog-3*  
764 males.
- 765 C) Fluorescence microscopy images of ubiquitous GFP-sensor expression  
766 in the soma of hermaphrodites and males (left, for both n=54).  
767 *gfp(RNAi)* silencing of somatic GFP in non-neuronal cells was  
768 observed in all hermaphrodites and males (right, respectively n=57 and  
769 n= 60).
- 770 D) Background subtracted sperm GFP-sensor chromatin signal intensity  
771 (mean  $\pm$ SE) upon *gfp(RNAi)* in hermaphrodites (n=10), males (n=9)  
772 and *fem-3* hermaphrodites producing only sperm (n=15). Signal  
773 intensity was normalized to animals not exposed to dsRNA (n=10  
774 hermaphrodites, 11 males, 12 *fem-3* hermaphrodites). T-test was  
775 applied for significance test; \*\*\* =  $p < 0.001$ .

776

## 777 **ADDITIONAL DATA**

778 **Additional file 1.pdf:** Supplemental figures S1-S4.

## 779 **SUPPLEMENTAL FIGURE LEGENDS**

780 **Figure S1:** Somatic gonad sex-differences in expression of miRNA and  
781 endogenous siRNA.

782 A) Mean normalized miRNA reads (sense) in hermaphrodite (n=6  
783 replicates) and male gonads (n=3). miRNA expression-differences with  
784 four-fold difference in abundance that were statistically different  
785 (Wilcoxon rank sum test with continuity correction; p adjusted<0.01)  
786 between gonads of hermaphrodites and males as well as between  
787 hermaphrodites and *fog-3* males (n=2) are highlighted in red (female  
788 somatic gonad-biased) and blue (male somatic gonad-biased).

789 B) Mean normalized endogenous siRNA reads (antisense) in  
790 hermaphrodite and male gonads; same analyses and representation  
791 used as in Fig S1A.

792

793 **Figure S2:** Hermaphrodite and male gonadal 26G RNA and 22G RNA.

794 A) Percentage of antisense reads in hermaphrodite and male gonads  
795 classified as primary 26G RNA, secondary 22G RNA or other siRNAs  
796 type.

797 B) Normalized mean 26G RNA and 22G RNA reads in hermaphrodite and  
798 male gonads per gene.

799

800 **Figure S3:** Statistical analysis of gonadal mRNA and siRNA expression  
801 levels.

802 A) Mean normalized mRNA reads [54] and siRNAs in percentiles in  
803 hermaphrodite and male gonads. For 20 bins (each representing 5% of



804 data i.e. 427 genes per bin in hermaphrodites and 504 in males) a  
805 linear model was fitted (black line)

806 B) p-values indicate whether the linear model deviates from zero. The  
807 most significant negative correlation between the levels of 22G RNA  
808 and mRNA was found for the 5% of the genes with highest level of 22G  
809 RNA expression (shaded).

810

811 **Figure S4:** Sex-differences in RNAi efficacy in female germlines.

812 Mean primary and secondary siRNA reads normalized to total reads in  
813 gonads from hermaphrodites (circles indicate replicates n=4; data from  
814 figure 3B) and *fog-3* males (n=2) raised on *gfp(RNAi)*. Mean secondary  
815 siRNA/ primary siRNA ratio. T-test was applied for significance test; \* =  
816  $p < 0.05$ , \*\*\* =  $p < 0.001$ .

817

818 **Additional file 2.xls:** Summary gonadal small RNA expression.

819 Analyses of sex-biased miRNA, piRNA, germline siRNA, sense and  
820 antisense reads

821

822 **Additional file 3.xls:** Sequencing details.

823 Accession and genotype of each replicate

824

825

826

827 **REFERENCES**

- 828 1. Miska EA, Ferguson-Smith AC. Transgenerational inheritance: Models and  
829 mechanisms of non-DNA sequence-based inheritance. *Science* (80-. ). 2016.  
830 p. 59–63.
- 831 2. Grishok A, Tabara H, Mello CC. Genetic requirements for inheritance of  
832 RNAi in *C. elegans*. *Science*. 2000;287:2494–7.
- 833 3. Luteijn MJ, van Bergeijk P, Kaaij LJT, Almeida MV, Roovers EF, Berezikov  
834 E, et al. Extremely stable Piwi-induced gene silencing in *Caenorhabditis*  
835 *elegans*. *EMBO J*. 2012;31:3422–30.
- 836 4. Shirayama M, Seth M, Lee HC, Gu W, Ishidate T, Conte D, et al. PiRNAs  
837 initiate an epigenetic memory of nonself RNA in the *C. elegans* germline. *Cell*.  
838 2012;150:65–77.
- 839 5. Schott D, Yanai I, Hunter CP. Natural RNA interference directs a heritable  
840 response to the environment. *Sci Rep*. 2014;4:7387.
- 841 6. Fire A, Xu S, Montgomery MK, Kostas SA, Driver SE, Mello CC. Potent and  
842 specific genetic interference by double-stranded RNA in *Caenorhabditis*  
843 *elegans*. *Nature*. 1998;391:806–11.
- 844 7. Rechavi O, Minevich G, Hobert O. Transgenerational Inheritance of an  
845 Acquired Small RNA-Based Antiviral Response in *C. elegans*. *Cell*.  
846 2011;147:1248–56.
- 847 8. Jobson MA, Jordan JM, Sandrof MA, Hibshman JD, Lennox AL, Baugh LR.  
848 Transgenerational Effects of Early Life Starvation on Growth, Reproduction,  
849 and Stress Resistance in *Caenorhabditis elegans*. *Genetics*. 2015;201:201–  
850 12.
- 851 9. Vastenhouw NL, Brunschwig K, Okihara KL, Muller F, Tijsterman M,

- 852 Plasterk RHA. Gene expression: long-term gene silencing by RNAi. *Nature*.  
853 2006;442:882.
- 854 10. Alcazar RM, Lin R, Fire AZ. Transmission dynamics of heritable silencing  
855 induced by double-stranded RNA in *Caenorhabditis elegans*. *Genetics*.  
856 2008;180:1275–88.
- 857 11. Lev I, Seroussi U, Gingold H, Brill R, Anava S, Rechavi O. MET-2-  
858 Dependent H3K9 Methylation Suppresses Transgenerational Small RNA  
859 Inheritance. *Curr Biol*. 2017;27:1138–47.
- 860 12. Winston WM, Molodowitch C, Hunter CP. Systemic RNAi in *C. elegans*  
861 requires the putative transmembrane protein SID-1. *Science*. 2002;295:2456–  
862 9.
- 863 13. Winston WM, Sutherlin M, Wright AJ, Feinberg EH, Hunter CP.  
864 *Caenorhabditis elegans* SID-2 is required for environmental RNA interference.  
865 *Proc Natl Acad Sci*. 2007;104:10565–70.
- 866 14. Tabara H, Yigit E, Siomi H, Mello CC. The dsRNA binding protein RDE-4  
867 interacts with RDE-1, DCR-1, and a DEXH-box helicase to direct RNAi in *C*.  
868 *elegans*. *Cell*. 2002;109:861–71.
- 869 15. Parker GS, Eckert DM, Bass BL. RDE-4 preferentially binds long dsRNA  
870 and its dimerization is necessary for cleavage of dsRNA to siRNA. *RNA*.  
871 2006;12:807–18.
- 872 16. Sijen T, Fleenor J, Simmer F, Thijssen KL, Parrish S, Timmons L, et al.  
873 On the Role of RNA Amplification in dsRNA-Triggered Gene Silencing. *Cell*.  
874 2001;107:465–76.
- 875 17. Sijen T, Steiner FA, Thijssen KL, Plasterk RHA. Secondary siRNAs Result  
876 from Unprimed RNA Synthesis and Form a Distinct Class. *Science*.

- 877 2007;315:244–7.
- 878 18. Pak J, Fire A. Distinct Populations of Primary and Secondary Effectors  
879 During RNAi in *C. elegans*. *Science*. 2007;315:241–4.
- 880 19. Gu W, Shirayama M, Conte D, Vasale J, Batista PJ, Claycomb JM, et al.  
881 Distinct Argonaute-Mediated 22G-RNA Pathways Direct Genome Surveillance  
882 in the *C. elegans* Germline. *Mol Cell*. 2009;36:231–44.
- 883 20. Grishok A, Sinskey JL, Sharp PA. Transcriptional silencing of a transgene  
884 by RNAi in the soma of *C. elegans*. *Genes Dev*. 2005;19:683–96.
- 885 21. Guang S, Bochner AF, Burkhart KB, Burton N, Pavelec DM, Kennedy S.  
886 Small regulatory RNAs inhibit RNA polymerase II during the elongation phase  
887 of transcription. *Nature*. 2010;465:1097–101.
- 888 22. Buckley BA, Burkhart KB, Gu SG, Spracklin G, Kershner A, Fritz H, et al.  
889 A nuclear Argonaute promotes multigenerational epigenetic inheritance and  
890 germline immortality. *Nature*. 2012;489:447–51.
- 891 23. Martinez NJ, Ow MC, Reece-Hoyes JS, Barrasa MI, Ambros VR, Walhout  
892 AJM. Genome-scale spatiotemporal analysis of *Caenorhabditis elegans*  
893 microRNA promoter activity. *Genome Res*. 2008;18:2005–15.
- 894 24. Kato M, de Lencastre A, Pincus Z, Slack FJ. Dynamic expression of small  
895 non-coding RNAs, including novel microRNAs and piRNAs/21U-RNAs, during  
896 *Caenorhabditis elegans* development. *Genome Biol*. 2009;10:R54.
- 897 25. Alberti C, Manzenreither RA, Sowemimo I, Burkard TR, Wang J,  
898 Mahofsky K, et al. Cell-Type specific sequencing of microRNAs from complex  
899 animal tissues. *Nat Methods*. 2018;15:283–9.
- 900 26. Diag A, Schilling M, Klironomos F, Ayoub S, Rajewsky N. Regulation of  
901 spatial and temporal gene expression in an animal germline. *bioRxiv*. Cold

- 902 Spring Harbor Laboratory; 2018;348425.
- 903 27. Alvarez-Saavedra E, Horvitz HR. Many Families of *C. elegans* MicroRNAs  
904 Are Not Essential for Development or Viability. *Curr Biol.* 2010;20:367–73.
- 905 28. McJunkin K, Ambros V. The embryonic mir-35 family of microRNAs  
906 promotes multiple aspects of fecundity in *Caenorhabditis elegans*. *G3.*  
907 2014;4:1747–54.
- 908 29. McEwen TJ, Yao Q, Yun S, Lee C-Y, Bennett KL. Small RNA in situ  
909 hybridization in *Caenorhabditis elegans*, combined with RNA-seq, identifies  
910 germline-enriched microRNAs. *Dev Biol.* 2016;418:248–57.
- 911 30. Han T, Manoharan AP, Harkins TT, Bouffard P, Fitzpatrick C, Chu DS, et  
912 al. 26G endo-siRNAs regulate spermatogenic and zygotic gene expression in  
913 *Caenorhabditis elegans*. *Proc Natl Acad Sci U S A.* 2009;106:18674–9.
- 914 31. Vasale JJ, Gu W, Thivierge C, Batista PJ, Claycomb JM, Youngman EM,  
915 et al. Sequential rounds of RNA-dependent RNA transcription drive  
916 endogenous small-RNA biogenesis in the ERGO-1/Argonaute pathway. *Proc*  
917 *Natl Acad Sci U S A.* 2010;107:3582–7.
- 918 32. Conine CC, Batista PJ, Gu W, Claycomb JM, Chaves DA, Shirayama M,  
919 et al. Argonautes ALG-3 and ALG-4 are required for spermatogenesis-specific  
920 26G-RNAs and thermotolerant sperm in *Caenorhabditis elegans*. *Proc Natl*  
921 *Acad Sci U S A.* 2010;107:3588–93.
- 922 33. Conine CC, Moresco JJ, Gu W, Shirayama M, Conte D, Yates JR, et al.  
923 Argonautes Promote Male Fertility and Provide a Paternal Memory of  
924 Germline Gene Expression in *C. elegans*. *Cell.* 2013;155:1532–44.
- 925 34. Gerson-Gurwitz A, Wang S, Sathe S, Green R, Yeo GW, Oegema K, et al.  
926 A Small RNA-Catalytic Argonaute Pathway Tunes Germline Transcript Levels

- 927 to Ensure Embryonic Divisions. *Cell*. 2016;165:396–409.
- 928 35. Wang G, Reinke V. A *C. elegans* Piwi, PRG-1, Regulates 21U-RNAs  
929 during Spermatogenesis. *Curr Biol*. 2008;18:861–7.
- 930 36. Batista PJ, Ruby JG, Claycomb JM, Chiang R, Fahlgren N, Kasschau KD,  
931 et al. PRG-1 and 21U-RNAs Interact to Form the piRNA Complex Required  
932 for Fertility in *C. elegans*. *Mol Cell*. 2008;31:67–78.
- 933 37. Shi Z, Montgomery TA, Qi Y, Ruvkun G. High-throughput sequencing  
934 reveals extraordinary fluidity of miRNA, piRNA, and siRNA pathways in  
935 nematodes. *Genome Res*. 2013;23:497–508.
- 936 38. Das PP, Bagijn MP, Goldstein LD, Woolford JR, Lehrbach NJ,  
937 Sapetschnig A, et al. Piwi and piRNAs Act Upstream of an Endogenous  
938 siRNA Pathway to Suppress Tc3 Transposon Mobility in the *Caenorhabditis*  
939 *elegans* Germline. *Mol Cell*. 2008;31:79–90.
- 940 39. Gu W, Lee HC, Chaves D, Youngman EM, Pazour GJ, Conte D, et al.  
941 CapSeq and CIP-TAP identify pol ii start sites and reveal capped small RNAs  
942 as *C. elegans* piRNA precursors. *Cell*. 2012;151:1488–500.
- 943 40. Killian DJ, Hubbard EJA. *Caenorhabditis elegans* germline patterning  
944 requires coordinated development of the somatic gonadal sheath and the  
945 germ line. *Dev Biol*. 2005;279:322–35.
- 946 41. Bukhari SIA, Vasquez-Rifo A, Gagné D, Paquet ER, Zetka M, Robert C, et  
947 al. The microRNA pathway controls germ cell proliferation and differentiation  
948 in *C. elegans*. *Cell Res*. 2012;22:1034–45.
- 949 42. Rios C, Warren D, Olson B, Abbott AL. Functional analysis of microRNA  
950 pathway genes in the somatic gonad and germ cells during ovulation in *C.*  
951 *elegans*. *Dev Biol*. 2017;426:115–25.

- 952 43. Fraser AG, Kamath RS, Zipperlen P, Martinez-Campos M, Sohrmann M,  
953 Ahringer J. Functional genomic analysis of *C. elegans* chromosome I by  
954 systematic RNA interference. *Nature*. 2000;408:325–30.
- 955 44. Gönczy P, Echeverri C, Oegema K, Coulson A, Jones SJ, Copley RR, et  
956 al. Functional genomic analysis of cell division in *C. elegans* using RNAi of  
957 genes on chromosome III. *Nature*. 2000;408:331–6.
- 958 45. Green RA, Kao H-L, Audhya A, Arur S, Mayers JR, Fridolfsson HN, et al.  
959 A High-Resolution *C. elegans* Essential Gene Network Based on Phenotypic  
960 Profiling of a Complex Tissue. *Cell*. 2011;145:470–82.
- 961 46. Reinke V, Gil IS, Ward S, Kazmer K. Genome-wide germline-enriched and  
962 sex-biased expression profiles in *Caenorhabditis elegans*. *Development*.  
963 2003;131:311–23.
- 964 47. Roovers EF, Rosenkranz D, Mahdipour M, Han C-T, He N,  
965 Chuva de Sousa Lopes SM, et al. Piwi Proteins and piRNAs in Mammalian  
966 Oocytes and Early Embryos. *Cell Rep*. 2015;10:2069–82.
- 967 48. Ma X, Zhu Y, Li C, Xue P, Zhao Y, Chen S, et al. Characterisation of  
968 *Caenorhabditis elegans* sperm transcriptome and proteome. *BMC Genomics*.  
969 2014;15:168.
- 970 49. Ellis RE, Kimble J. The fog-3 gene and Regulation of Cell Fate in the  
971 Germ line of *Caenorhabditis elegans*. *Genetics*. 1995;139:561–77.
- 972 50. Noble DC, Aoki ST, Ortiz MA, Kim KW, Verheyden JM, Kimble J.  
973 Genomic Analyses of Sperm Fate Regulator Targets Reveal a Common Set  
974 of Oogenic mRNAs in *Caenorhabditis elegans*. *Genetics*. 2016;202:221–34.
- 975 51. Ruby JG, Jan C, Player C, Axtell MJ, Lee W, Nusbaum C, et al. Large-  
976 Scale Sequencing Reveals 21U-RNAs and Additional MicroRNAs and

- 977 Endogenous siRNAs in *C. elegans*. *Cell*. 2006;127:1193–207.
- 978 52. Billi AC, Freeberg MA, Day AM, Chun SY, Khivansara V, Kim JK. A  
979 conserved upstream motif orchestrates autonomous, germline-enriched  
980 expression of *Caenorhabditis elegans* piRNAs. Copenhaver GP, editor. *PLoS*  
981 *Genet*. 2013;9:e1003392.
- 982 53. Yang W, Dierking K, Schulenburg H. WormExp: a web-based application  
983 for a *Caenorhabditis elegans* -specific gene expression enrichment analysis.  
984 *Bioinformatics*. 2016;32:943–5.
- 985 54. West SM, Mecnas D, Gutwein M, Aristizábal-Corrales D, Piano F,  
986 Gunsalus KC. Developmental dynamics of gene expression and alternative  
987 polyadenylation in the *Caenorhabditis elegans* germline. *Genome Biol*.  
988 2018;19:8.
- 989 55. Bagijn MP, Goldstein LD, Sapetschnig A, Weick E-M, Bouasker S,  
990 Lehrbach NJ, et al. Function, targets, and evolution of *Caenorhabditis elegans*  
991 piRNAs. *Science*. 2012;337:574–8.
- 992 56. Chen F, Hersh BM, Conradt B, Zhou Z, Riemer D, Gruenbaum Y, et al.  
993 Translocation of *C. elegans* CED-4 to nuclear membranes during  
994 programmed cell death. *Science*. 2000;287:1485–9.
- 995 57. Luitjens C, Gallegos M, Kraemer B, Kimble J, Wickens M. CPEB proteins  
996 control two key steps in spermatogenesis in *C. elegans*. *Genes Dev*.  
997 2000;14:2596–609.
- 998 58. Sumiyoshi E, Sugimoto A, Yamamoto M. Protein phosphatase 4 is  
999 required for centrosome maturation in mitosis and sperm meiosis in *C*.  
1000 *elegans*. *J Cell Sci*. 2002;115:1403–10.
- 1001 59. Zhu G, Salazar G, Zlatic SA, Fiza B, Doucette MM, Heilman CJ, et al.



- 1002 SPE-39 family proteins interact with the HOPS complex and function in  
1003 lysosomal delivery. *Mol Biol Cell*. 2009;20:1223–40.
- 1004 60. von Tobel L, Mikeladze-Dvali T, Delattre M, Balestra FR, Blanchoud S,  
1005 Finger S, et al. SAS-1 Is a C2 Domain Protein Critical for Centriole Integrity in  
1006 *C. elegans*. Dutcher SK, editor. *PLoS Genet*. 2014;10:e1004777.
- 1007 61. Kang C, You Y -j., Avery L. Dual roles of autophagy in the survival of  
1008 *Caenorhabditis elegans* during starvation. *Genes Dev*. 2007;21:2161–71.
- 1009 62. Kalis AK, Kroetz MB, Larson KM, Zarkower D. Functional genomic  
1010 identification of genes required for male gonadal differentiation in  
1011 *Caenorhabditis elegans*. *Genetics*. 2010;185:523–35.
- 1012 63. Nelson MD, Zhou E, Kiontke K, Fradin H, Maldonado G, Martin D, et al. A  
1013 bow-tie genetic architecture for morphogenesis suggested by a genome-wide  
1014 RNAi screen in *Caenorhabditis elegans*. Chisholm AD, editor. *PLoS Genet*.  
1015 2011;7:e1002010.
- 1016 64. Pak J, Maniar JM, Mello CC, Fire A. Protection from Feed-Forward  
1017 Amplification in an Amplified RNAi Mechanism. *Cell*. 2012;151:885–99.
- 1018 65. Zhang C, Montgomery TA, Fischer SEJ, Garcia SMDA, Riedel CG,  
1019 Fahlgren N, et al. The *Caenorhabditis elegans* RDE-10/RDE-11 Complex  
1020 Regulates RNAi by Promoting Secondary siRNA Amplification. *Curr Biol*.  
1021 2012;22:881–90.
- 1022 66. Tsai H-Y, Chen C-CG, Conte D, Moresco JJ, Chaves DA, Mitani S, et al.  
1023 A Ribonuclease Coordinates siRNA Amplification and mRNA Cleavage during  
1024 RNAi. *Cell*. 2015;160:407–19.
- 1025 67. Ooi SL, Priess JR, Henikoff S. Histone H3.3 Variant Dynamics in the  
1026 Germline of *Caenorhabditis elegans*. *PLoS Genet*. 2006;2:e97.

- 1027 68. Barton MK, Schedl TB, Kimble J. Gain-of-Function Mutations of *fem-3*, a  
1028 Sex-Determination Gene in *Caenorhabditis elegans*. *Genetics*. 1987;115.
- 1029 69. McJunkin K, Ambros V. A microRNA family exerts maternal control on sex  
1030 determination in *C. elegans*. *Genes Dev*. 2017;31:422–37.
- 1031 70. Lim LP, Lau NC, Weinstein EG, Abdelhakim A, Yekta S, Rhoades MW, et  
1032 al. The microRNAs of *Caenorhabditis elegans*. *Genes Dev*. 2003;17:991–  
1033 1008.
- 1034 71. de Lencastre A, Pincus Z, Zhou K, Kato M, Lee SS, Slack FJ. MicroRNAs  
1035 Both Promote and Antagonize Longevity in *C. elegans*. *Curr Biol*.  
1036 2010;20:2159–68.
- 1037 72. Pincus Z, Smith-Vikos T, Slack FJ. MicroRNA Predictors of Longevity in  
1038 *Caenorhabditis elegans*. Kim SK, editor. *PLoS Genet*. 2011;7:e1002306.
- 1039 73. Ortiz MA, Noble D, Sorokin EP, Kimble J. A new dataset of spermatogenic  
1040 vs. oogenic transcriptomes in the nematode *Caenorhabditis elegans*. *G3*.  
1041 2014;4:1765–72.
- 1042 74. van Wolfswinkel JC, Claycomb JM, Batista PJ, Mello CC, Berezikov E,  
1043 Ketting RF. CDE-1 Affects Chromosome Segregation through Uridylation of  
1044 CSR-1-Bound siRNAs. *Cell*. 2009;139:135–48.
- 1045 75. Claycomb JM, Batista PJ, Pang KM, Gu W, Vasale JJ, van Wolfswinkel  
1046 JC, et al. The Argonaute CSR-1 and Its 22G-RNA Cofactors Are Required for  
1047 Holocentric Chromosome Segregation. *Cell*. 2009;139:123–34.
- 1048 76. Yigit E, Batista PJ, Bei Y, Pang KM, Chen C-CG, Tolia NH, et al. Analysis  
1049 of the *C. elegans* Argonaute Family Reveals that Distinct Argonautes Act  
1050 Sequentially during RNAi. *Cell*. 2006;127:747–57.
- 1051 77. Hodgkin J, Horvitz HR, Brenner S. Nondisjunction Mutants of the

- 1052 Nematode *Caenorhabditis elegans*. Genetics. 1979;91:67–94.
- 1053 78. Zhang C, Montgomery TA, Gabel HW, Fischer SEJ, Phillips CM, Fahlgren  
1054 N, et al. mut-16 and other mutator class genes modulate 22G and 26G siRNA  
1055 pathways in *Caenorhabditis elegans*. Proc Natl Acad Sci U S A.  
1056 2011;108:1201–8.
- 1057 79. Kamath RS, Martinez-Campos M, Zipperlen P, Fraser AG, Ahringer J.  
1058 Effectiveness of specific RNA-mediated interference through ingested double-  
1059 stranded RNA in *Caenorhabditis elegans*. Genome Biol.  
1060 2001;2:RESEARCH0002.
- 1061 80. O’Connell J, Arganda-Carreras I, Frise E, Kaynig V, Longair M, Pietzsch  
1062 T, et al. Fiji: an open-source platform for biological-image analysis. Nat  
1063 Methods. 2012;9:676–82.
- 1064 81. Peters N, Perez DE, Song MH, Liu Y, Muller-Reichert T, Caron C, et al.  
1065 Control of mitotic and meiotic centriole duplication by the Plk4-related kinase  
1066 ZYG-1. J Cell Sci. 2010;123:795–805.
- 1067
- 1068
- 1069
- 1070
- 1071

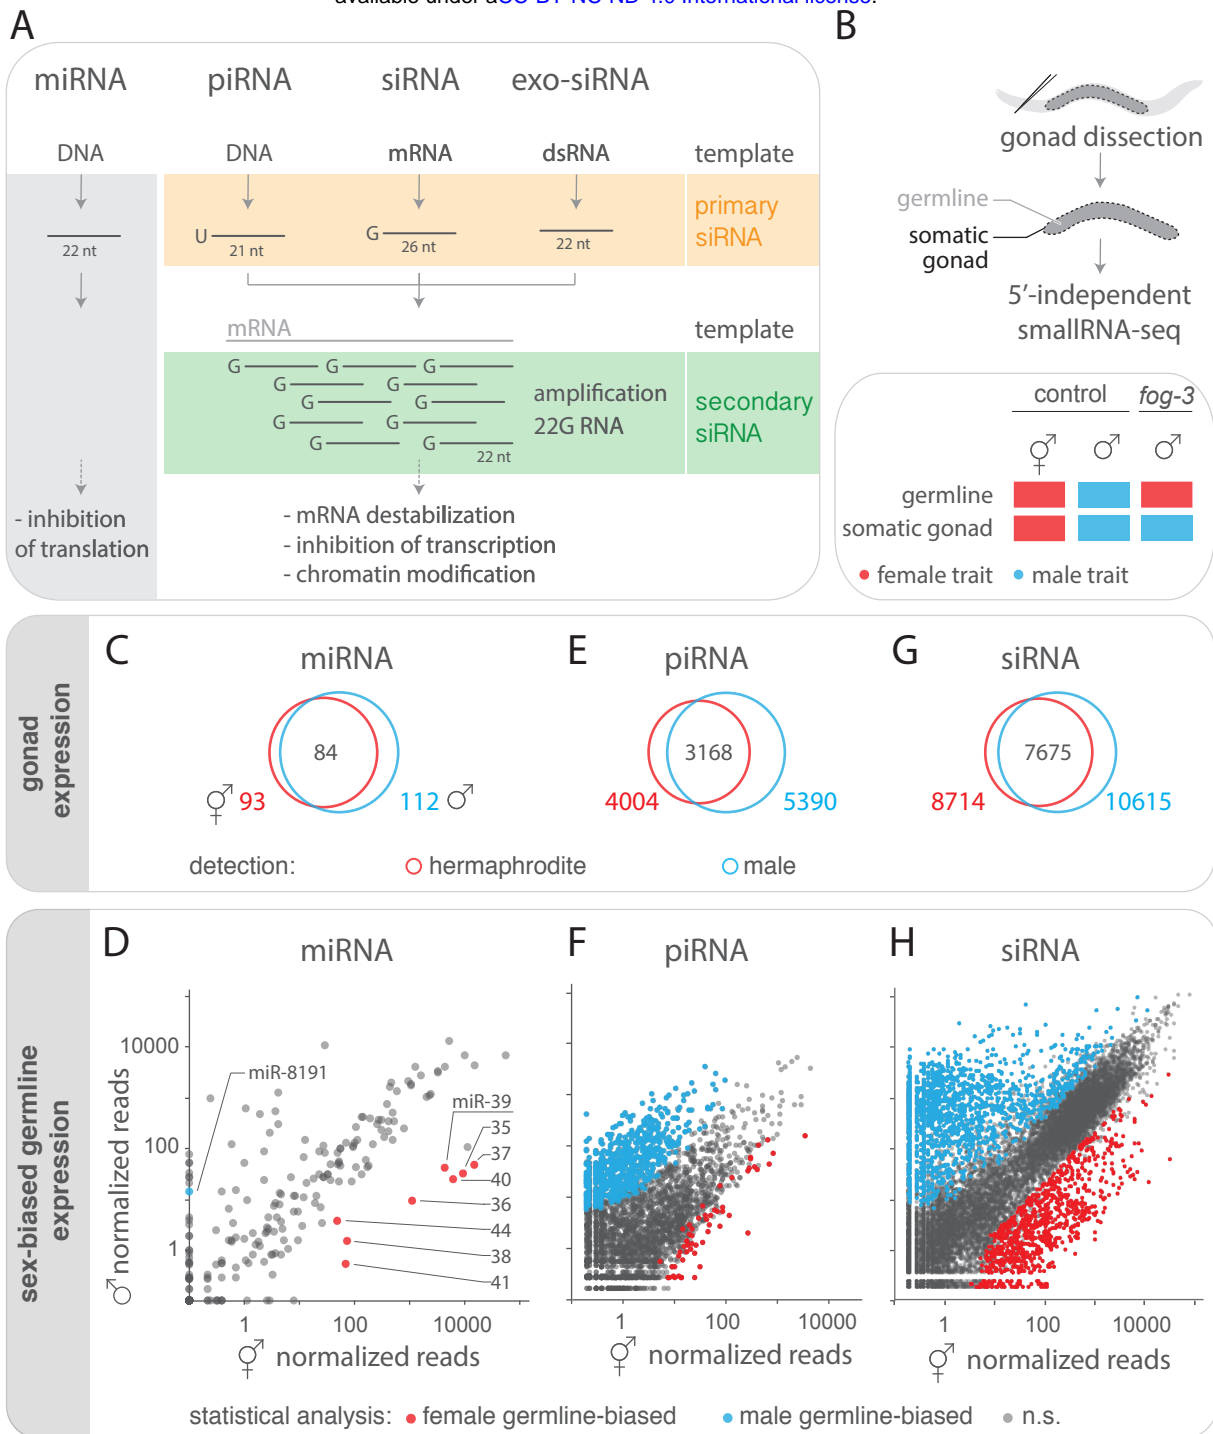

Figure 1

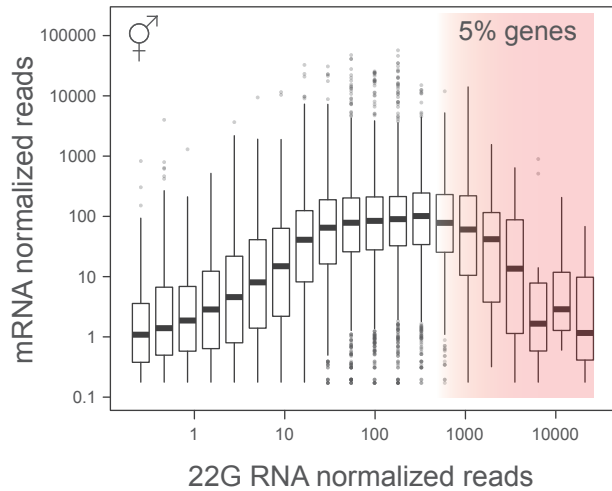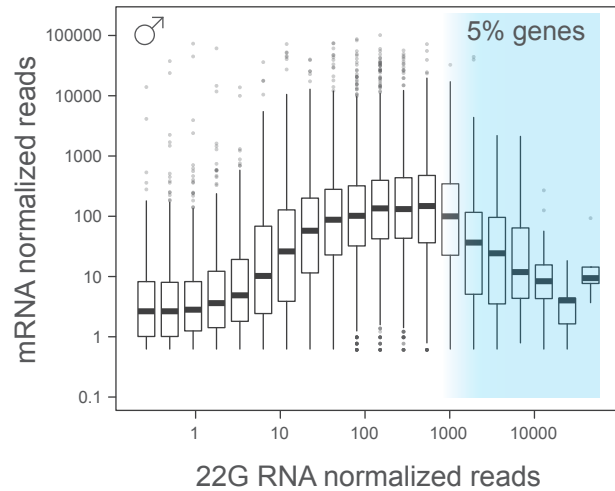

Figure 2

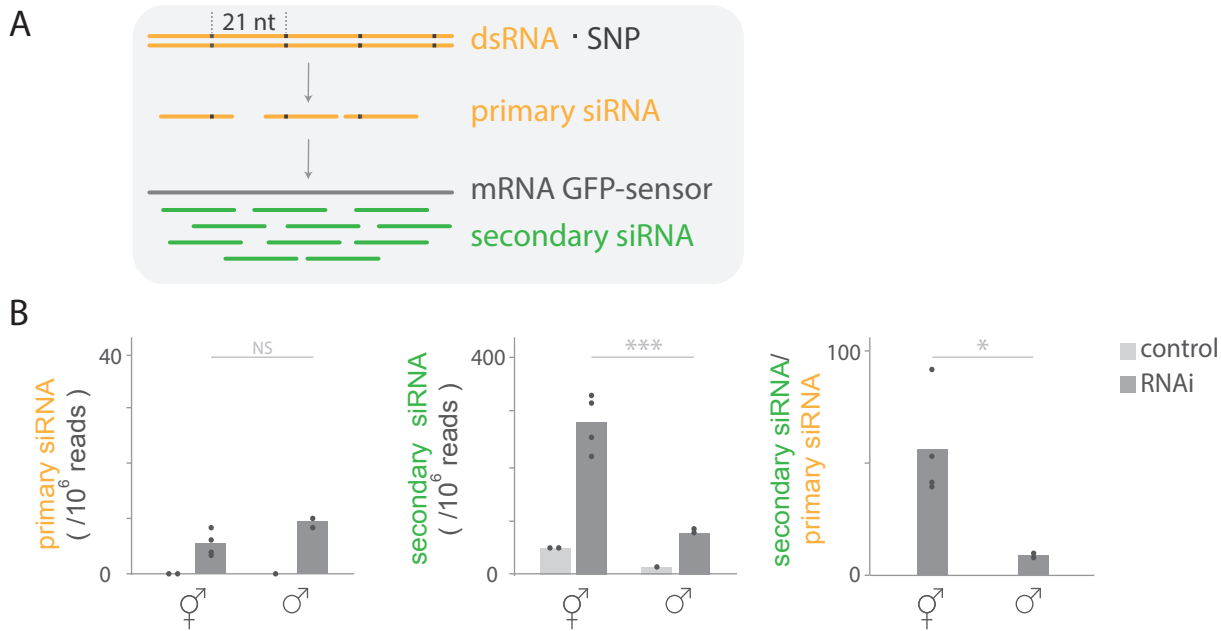

Figure 3

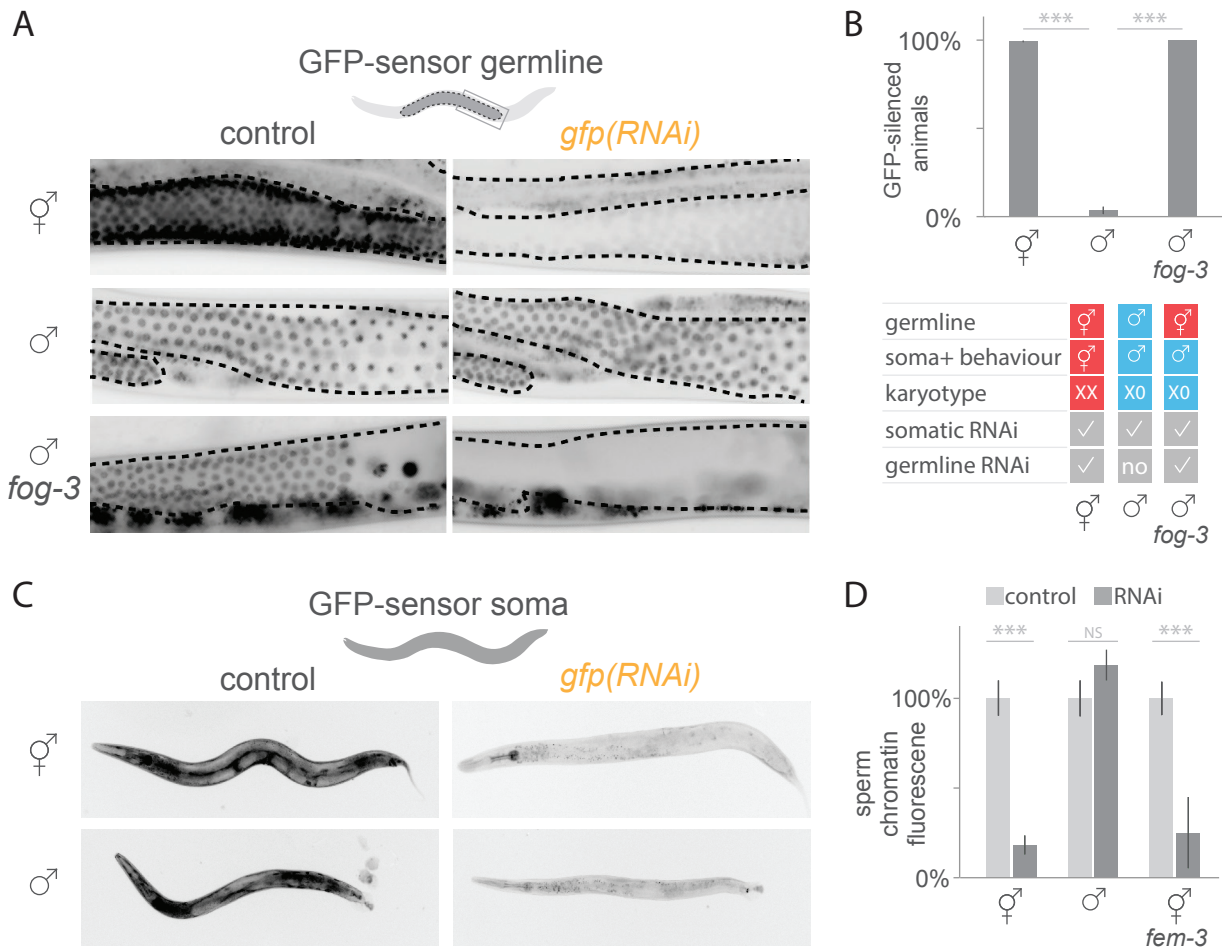

Figure 4

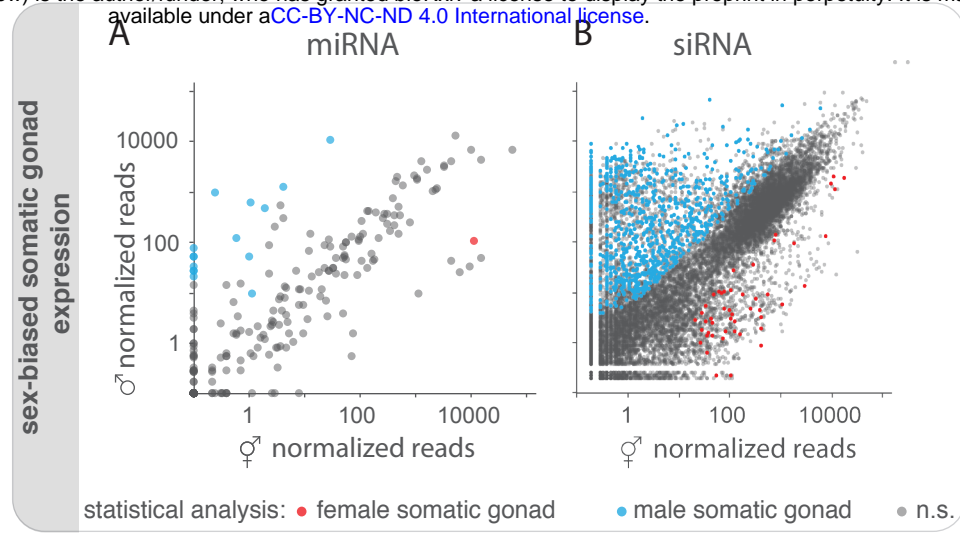

Figure S1



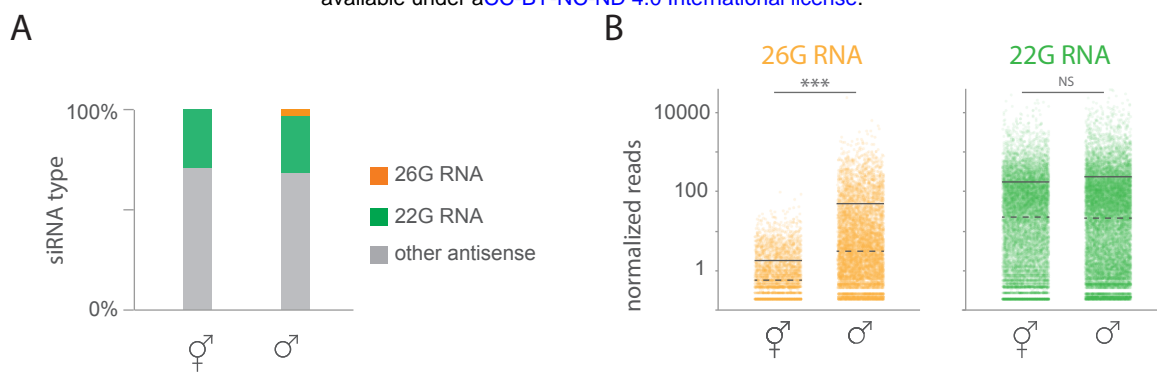

Figure S2

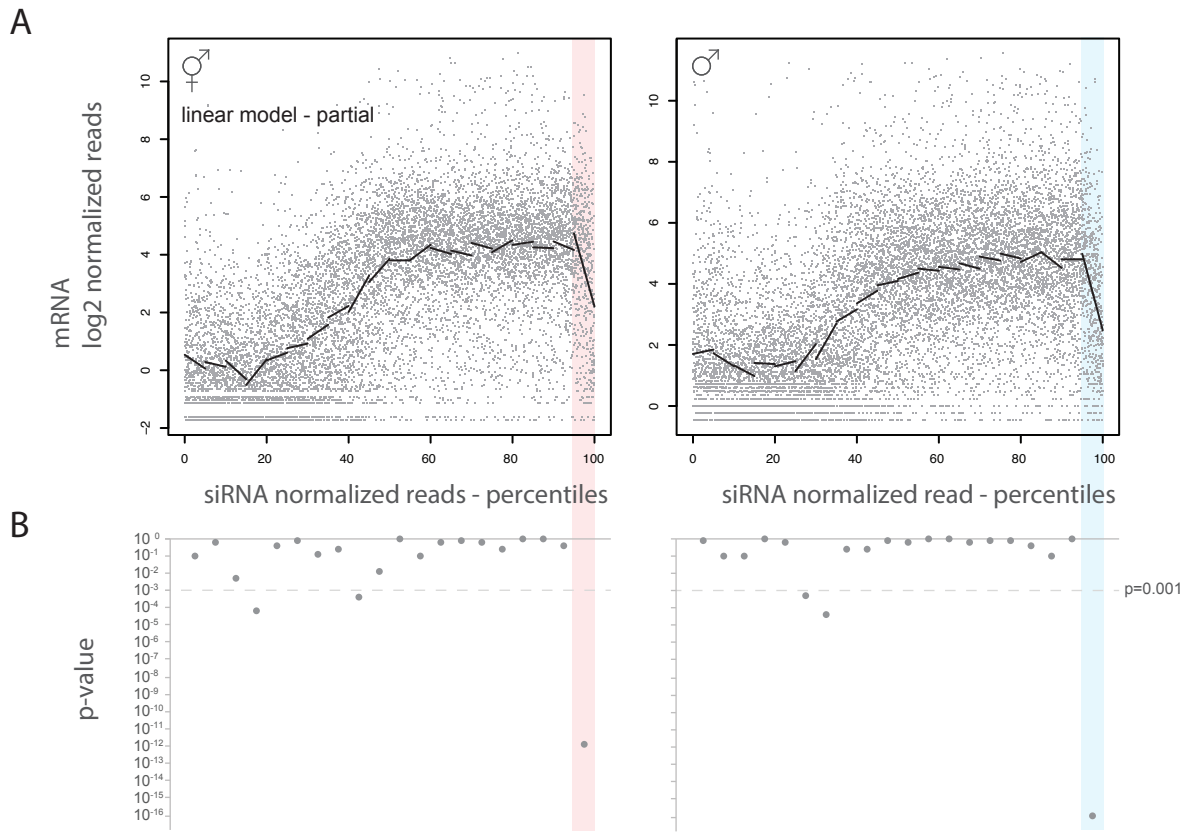

Figure S3

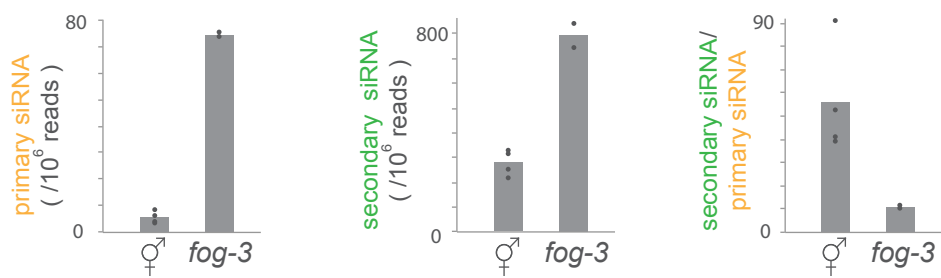

Figure S4
